# Supplementary material for: Shared genetic etiology underlying Alzheimer’s disease and major depressive disorder
Source: PubMed Central journal article supplement (PMC7062839; doi:10.1038/s41398-020-0769-y), 2020-03-09

Supplemental Fig. S1. Manhattan plots of the GWAS results for LOAD and MDD

A

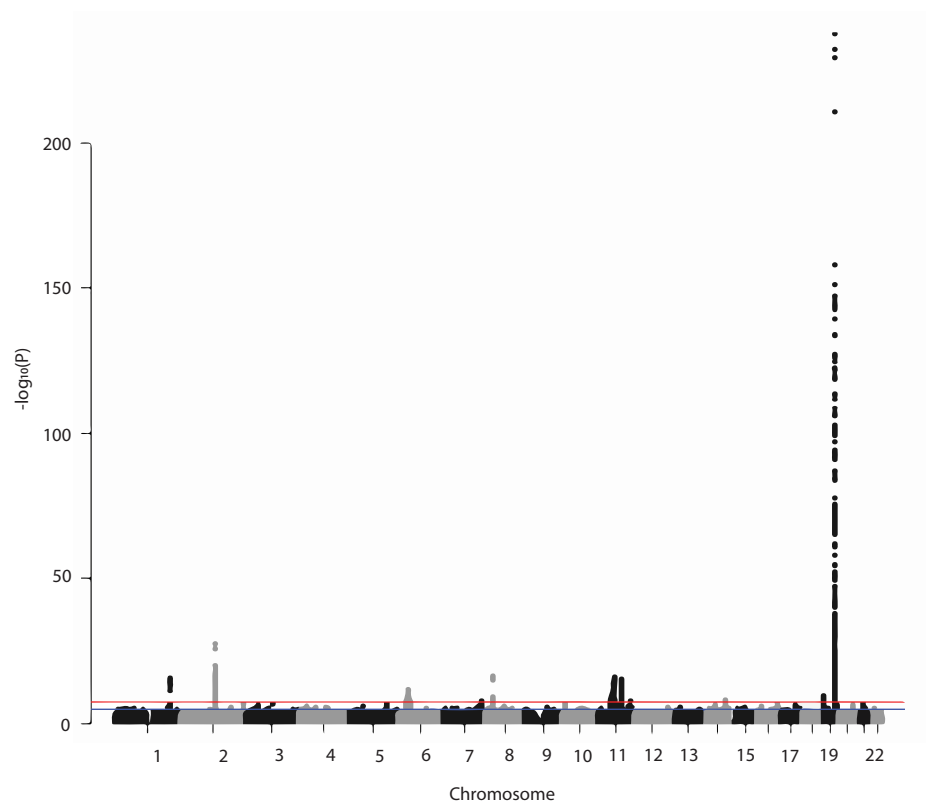

B

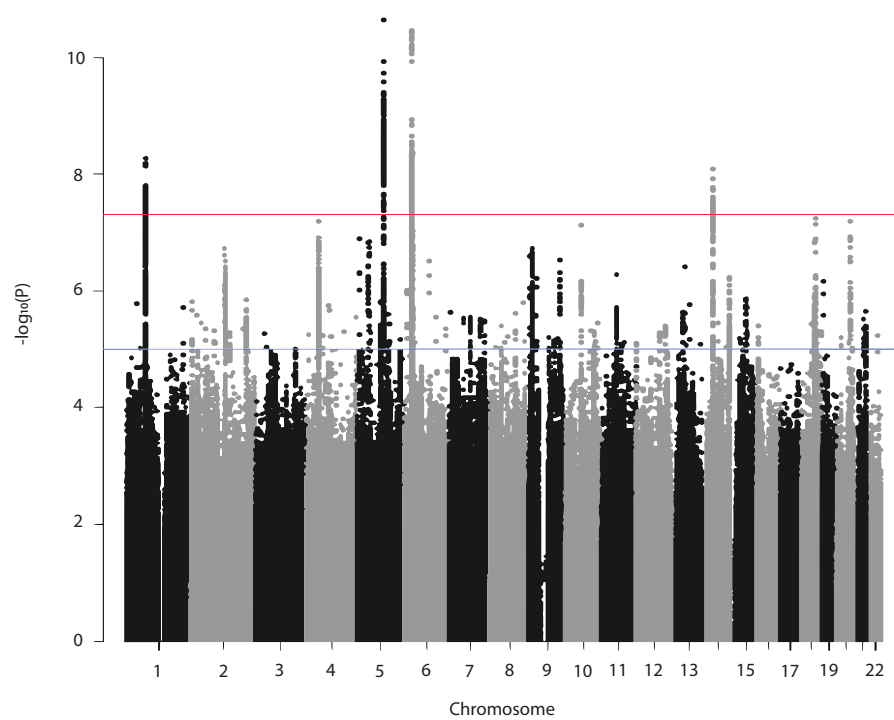

Supplement: 41398_2020_769_MOESM2_ESM.pdf [file 41398_2020_769_MOESM2_ESM.pdf]
